# Supplementary material
Source: PubMed Central journal article supplement (PMC4966339)

# The Future of Hepatocellular Carcinoma Incidence in the United States Forecast through 2030

Petrick, et al

## Supplemental Methods

We define the probability of disease:

$$P(D) = P(E) * P(D|E) + P(\bar{E}) * P(D|\bar{E})$$

We define  $\bar{\lambda}$  as the rate of HCC in any given age and cohort group,  $\lambda_0$  as the baseline rate in the unexposed, and  $\pi$  as the prevalence of HCV in any given birth cohort. Finally, we define the relative risk of HCC among those infected with HCV of 40.0. Thus we rewrite the above equation as follows:

$$\bar{\lambda} = \pi * 40\lambda_0 + (1 - \pi) * \lambda_0$$

To demonstrate this example, we will use forecasted data for men aged 70 in 2030. The number of forecasted cases is 246, the population size is 243,139. Thus, the incidence rate OF HCC is 101.0 per 100,000 man-years. Utilizing NHANES 2011-2012 data, we applied a prevalence rate of 4,532 HCV infections per 100,000 men. We will assume a linear 50% uptake by 2030. That is, each year 3.7% of the remaining HCV infection would be treated. Thus, by 2030 the total amount of HCV infections treated would be  $1 - (1 - 0.037776)^{18} = 0.5$ .

$$\begin{aligned} 101.0 &= 0.04532 * 40\lambda_0 + (1 - 0.04532) * \lambda_0 \\ 101.0 &= (0.04532 * 40 + 0.95468) * \lambda_0 \\ \lambda_0 &= 101.0 / (0.04532 * 40 + 0.95468) \\ \lambda_0 &= 36.51 \end{aligned}$$

This is our baseline rate in the unexposed group, per 100,000 man-years. If we weight this by the proportion of man-years in the unexposed group (i.e.,  $1 - \pi$ ), we get 34.9 HCC cases in the unexposed group and 66.2 cases in the exposed group.

Now let's assume, as this is 2030 data, that we were able to treat 50% of those exposed with 100% efficacy leading to an HCC rate equal to unexposed individuals.

$$\begin{aligned} \bar{\lambda} &= \pi/2 * 40\lambda_0 + \pi/2 * \lambda_0 + (1 - \pi) * \lambda_0 \\ \bar{\lambda} &= 0.02266 * 40 * 36.51 + 0.02266 * 36.51 + 0.95468 * 36.51 \\ \bar{\lambda} &= 68.8 \end{aligned}$$

We would be able to decrease the rate of HCC from 101.0 to 68.8 per 100,000 for males, aged 70, in 2030. With 80% uptake (i.e., 8.5% of remaining infections treated each year), the rate would decrease even further to 49.4 per 100,000 man-years.

|           | No Intervention |           | Intervention 50% |           | Intervention 80% |           |
|-----------|-----------------|-----------|------------------|-----------|------------------|-----------|
|           | Cases           | Man-Years | Cases            | Man-Years | Cases            | Man-Years |
| Exposed   | 66.2            | 4,532     | 33.1             | 2,266.2   | 13.2             | 906.5     |
| Treated   | 0               | 0         | 0.8              | 2,266.2   | 1.3              | 3,625.9   |
| Unexposed | 34.9            | 95,467    | 34.9             | 95,467    | 34.9             | 95,467    |
| TOTAL     | 101.0           | 100,000   | 68.8             | 100,000   | 49.4             | 100,000   |

**Estimated Prevalence of Hepatitis C Antibody from NHANES 2011-2012.**

| Birth Cohort             | Sex   | HCV Prevalence |
|--------------------------|-------|----------------|
| Silent Generation, ≤1945 | Men   | 0.008419       |
|                          | Women | 0.00631        |
| Baby Boomers, 1946-1965  | Men   | 0.045324       |
|                          | Women | 0.023798       |
| Generation X, 1966-1980  | Men   | 0.015494       |
|                          | Women | 0.012335       |
| Millenials, 1981-1995    | Men   | 0.000594       |
|                          | Women | 0.000297       |

**Table S1.** Liver cancer incidence rates (per 100,000 person-years) and burden through 2030 by sex and race.

|          | 2010* | 2013   |      | 2020   |      | 2030   |      | Burden % change | Rate EAPC |         |
|----------|-------|--------|------|--------|------|--------|------|-----------------|-----------|---------|
|          | Rate  | No.    | Rate | No.    | Rate | No.    | Rate | 2013-30         | 2000-12   | 2013-30 |
| All      | 15.1  | 31,579 | 16.8 | 46,035 | 20.6 | 66,627 | 25.2 | 110.98          | 3.10      | 2.49    |
| Male     | 23.6  | 23,566 | 26.4 | 34,219 | 32.4 | 47,732 | 38.7 | 102.55          | 3.13      | 2.38    |
| Female   | 7.7   | 8,090  | 8.4  | 11,737 | 10.2 | 18,691 | 13.4 | 131.05          | 2.90      | 2.87    |
| Asian    | 25.9  | 2,197  | 25.3 | 2,601  | 22.6 | 3,033  | 19.0 | 38.07           | -1.14     | -1.70   |
| Hispanic | 23.4  | 3,986  | 25.4 | 6,160  | 29.1 | 9,590  | 31.8 | 140.58          | 1.83      | 1.43    |
| Black    | 18.9  | 4,686  | 21.7 | 6,783  | 26.2 | 8,758  | 28.5 | 86.92           | 2.87      | 1.65    |
| White    | 11.4  | 18,662 | 13.1 | 28,051 | 17.0 | 42,201 | 22.2 | 126.14          | 3.61      | 3.29    |

\*Number of HCC cases for 2010 are not provided, as these numbers are based on SEER data and not extrapolated to the entire US population.

**Table S2.** Hepatocellular carcinoma incidence rates (per 100,000 person-years) and burden through 2030 by age, sex, and race.

| <b>Age 65+</b> |       |        |      |        |      |        |       |                 |           |         |
|----------------|-------|--------|------|--------|------|--------|-------|-----------------|-----------|---------|
|                | 2010* | 2013   |      | 2020   |      | 2030   |       | Burden % change | Rate EAPC |         |
|                | Rate  | No.    | Rate | No.    | Rate | No.    | Rate  | 2013-30         | 2000-12   | 2013-30 |
| All            | 24.3  | 10,748 | 28.0 | 22,773 | 45.0 | 45,019 | 70.9  | 318.86          | 3.64      | 5.93    |
| Males          | 37.6  | 7,807  | 44.6 | 17,439 | 74.4 | 33,855 | 116.7 | 333.64          | 3.65      | 6.13    |
| Females        | 13.6  | 2,990  | 14.5 | 5,222  | 19.5 | 10,903 | 31.7  | 264.68          | 3.32      | 4.97    |
| Asian          | 55.5  | 849    | 52.7 | 1,167  | 48.9 | 1,619  | 45.5  | 90.67           | -1.14     | -0.75   |
| Hispanic       | 41.7  | 1,356  | 49.5 | 2,800  | 68.9 | 6,195  | 96.6  | 357.01          | 2.28      | 4.32    |
| Black          | 26.8  | 1,269  | 33.1 | 3,465  | 63.3 | 6,023  | 84.8  | 374.53          | 3.37      | 5.80    |
| White          | 17.4  | 6,293  | 20.8 | 14,311 | 37.0 | 30,201 | 65.3  | 379.92          | 4.22      | 7.34    |

  

| <b>Age 50-64</b> |       |        |      |        |      |        |      |                 |           |         |
|------------------|-------|--------|------|--------|------|--------|------|-----------------|-----------|---------|
|                  | 2010* | 2013   |      | 2020   |      | 2030   |      | Burden % change | Rate EAPC |         |
|                  | Rate  | No.    | Rate | No.    | Rate | No.    | Rate | 2013-30         | 2000-12   | 2013-30 |
| All              | 18.2  | 13,548 | 20.8 | 14,495 | 20.4 | 10,651 | 16.3 | -21.38          | 3.64      | -1.65   |
| Males            | 31.4  | 11,219 | 35.5 | 11,614 | 33.6 | 8,188  | 25.7 | -27.02          | 3.65      | -2.18   |
| Females          | 5.7   | 2,328  | 6.9  | 2,945  | 8.1  | 2,531  | 7.5  | 8.69            | 3.32      | 0.35    |
| Asian            | 24.0  | 806    | 24.0 | 833    | 20.5 | 742    | 14.6 | -7.95           | -1.14     | -2.95   |
| Hispanic         | 26.9  | 1,730  | 28.6 | 2,241  | 27.3 | 2,009  | 18.1 | 16.14           | 2.28      | -2.77   |
| Black            | 28.9  | 2,581  | 33.1 | 2,460  | 27.1 | 1,784  | 20.6 | -30.88          | 3.37      | -3.20   |
| White            | 13.8  | 7,817  | 16.3 | 8,180  | 16.3 | 4,800  | 11.5 | -38.59          | 4.22      | -2.28   |

  

| <b>Age 35-49</b> |       |       |      |       |      |      |      |                 |           |         |
|------------------|-------|-------|------|-------|------|------|------|-----------------|-----------|---------|
|                  | 2010* | 2013  |      | 2020  |      | 2030 |      | Burden % change | Rate EAPC |         |
|                  | Rate  | No.   | Rate | No.   | Rate | No.  | Rate | 2013-30         | 2000-12   | 2013-30 |
| All              | 2.0   | 1,310 | 2.0  | 1,085 | 1.7  | 559  | 0.8  | -57.36          | 3.64      | -5.67   |
| Males            | 3.2   | 1,046 | 3.2  | 828   | 2.6  | 368  | 1.0  | -64.80          | 3.65      | -6.83   |
| Females          | 0.8   | 279   | 0.8  | 247   | 0.8  | 229  | 0.7  | -18.08          | 3.32      | -1.85   |
| Asian            | 3.9   | 199   | 4.4  | 179   | 3.4  | 124  | 1.9  | -37.33          | -1.14     | -5.19   |
| Hispanic         | 2.9   | 273   | 2.8  | 252   | 2.2  | 107  | 0.8  | -60.62          | 2.28      | -8.25   |
| Black            | 2.2   | 222   | 2.5  | 165   | 1.8  | 62   | 0.6  | -72.24          | 3.37      | -7.94   |
| White            | 1.3   | 534   | 1.2  | 371   | 0.9  | 189  | 0.5  | -64.49          | 4.22      | -6.31   |

\*Number of HCC cases for 2010 are not provided, as these numbers are based on SEER data and not extrapolated to the entire US population.

**Figure S1.** Fitted incidence rates of hepatocellular carcinoma by race for A) males and b) females, by birth cohort.

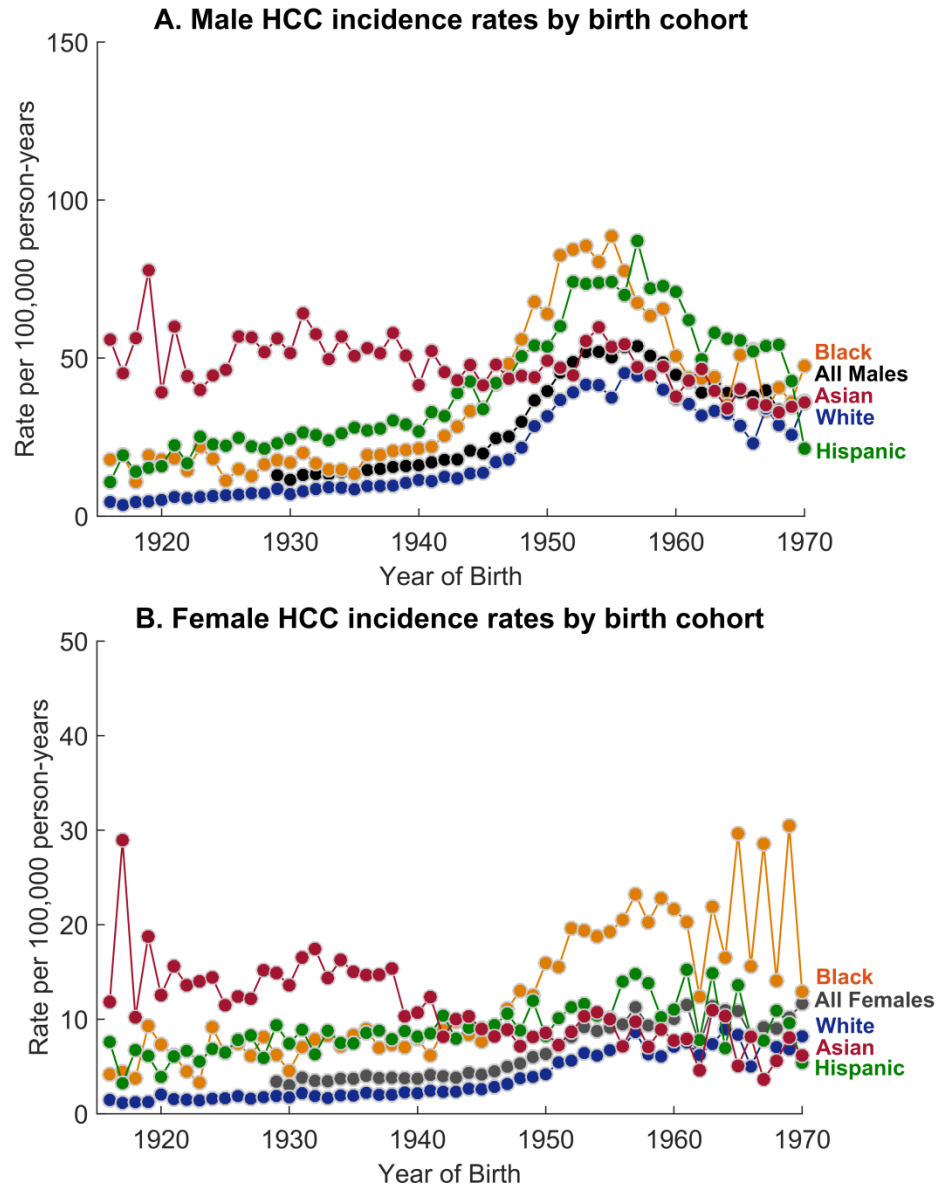

**Figure S2.** Observed and projected incidence of primary liver cancer (per 100,000 person-years) in Surveillance, Epidemiology, and End Results (SEER) 18, overall and by race in A) males and B) females. Shaded bands show point-wise 95% confidence limits.

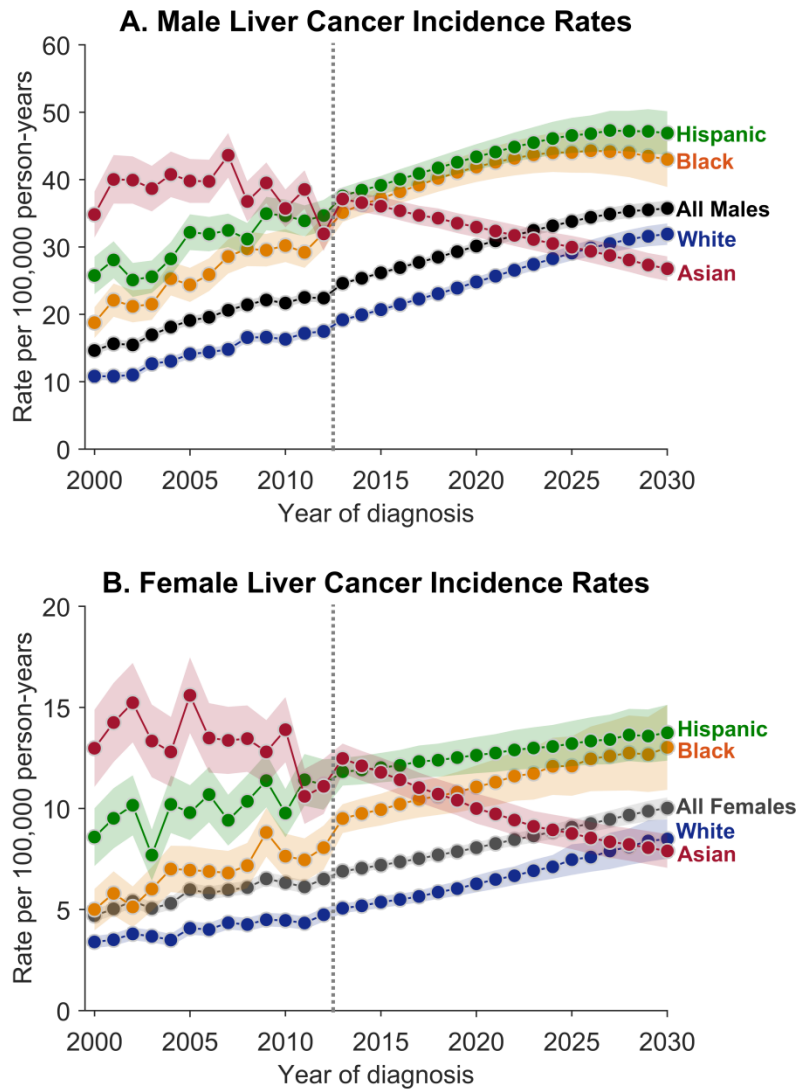

**Figure S3.** Observed and projected incidence of hepatocellular carcinoma (per 100,000 person-years) in Surveillance, Epidemiology, and End Results (SEER) 18, among 35-49 year olds overall and by race in A) males and B) females. Shaded bands show point-wise 95% confidence limits.

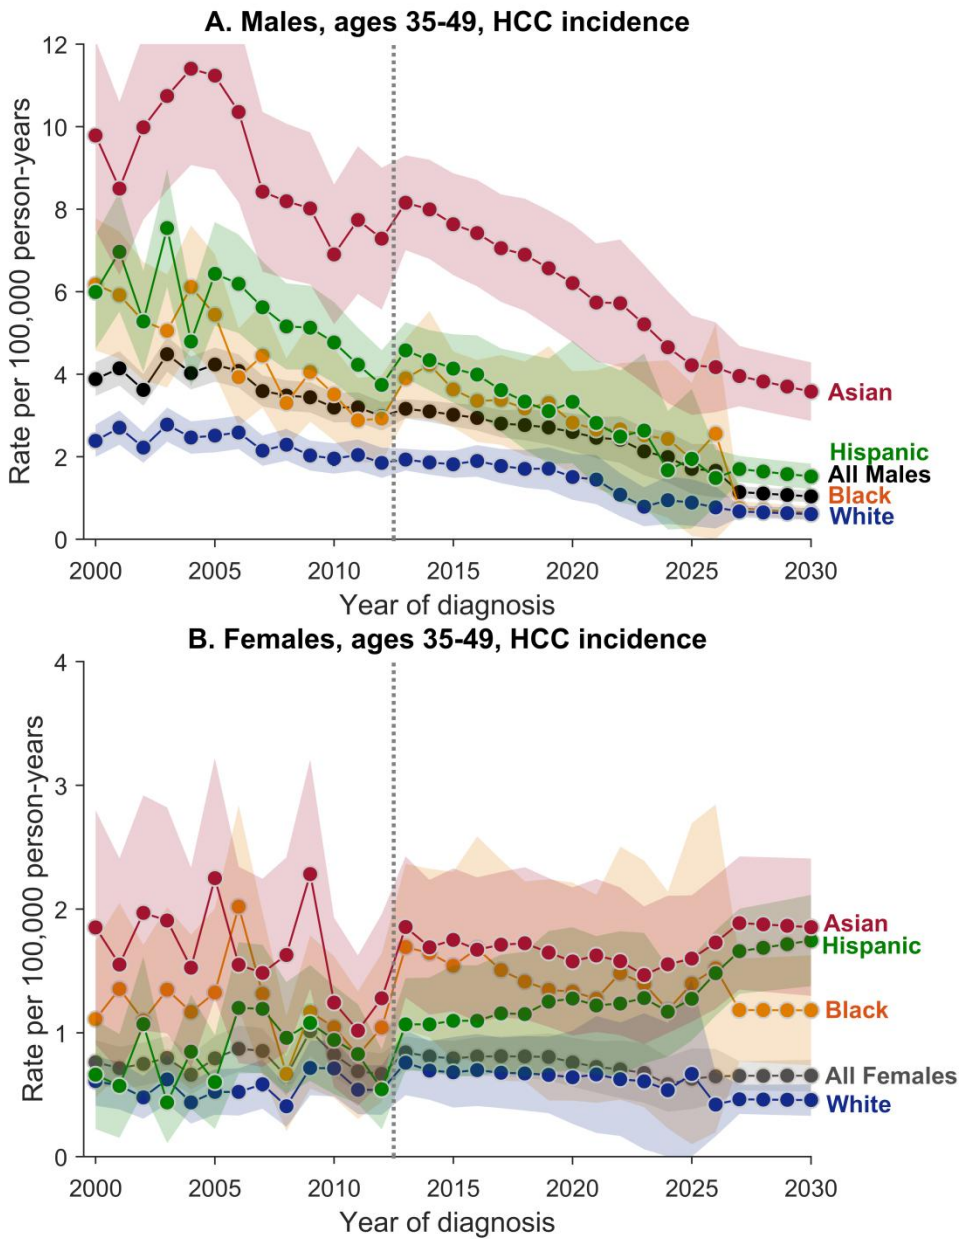

**Figure S4.** Observed and projected incidence of hepatocellular carcinoma (per 100,000 person-years) in Surveillance, Epidemiology, and End Results (SEER) 18, among 50-64 year olds overall and by race in A) males and B) females. Shaded bands show point-wise 95% confidence limits.

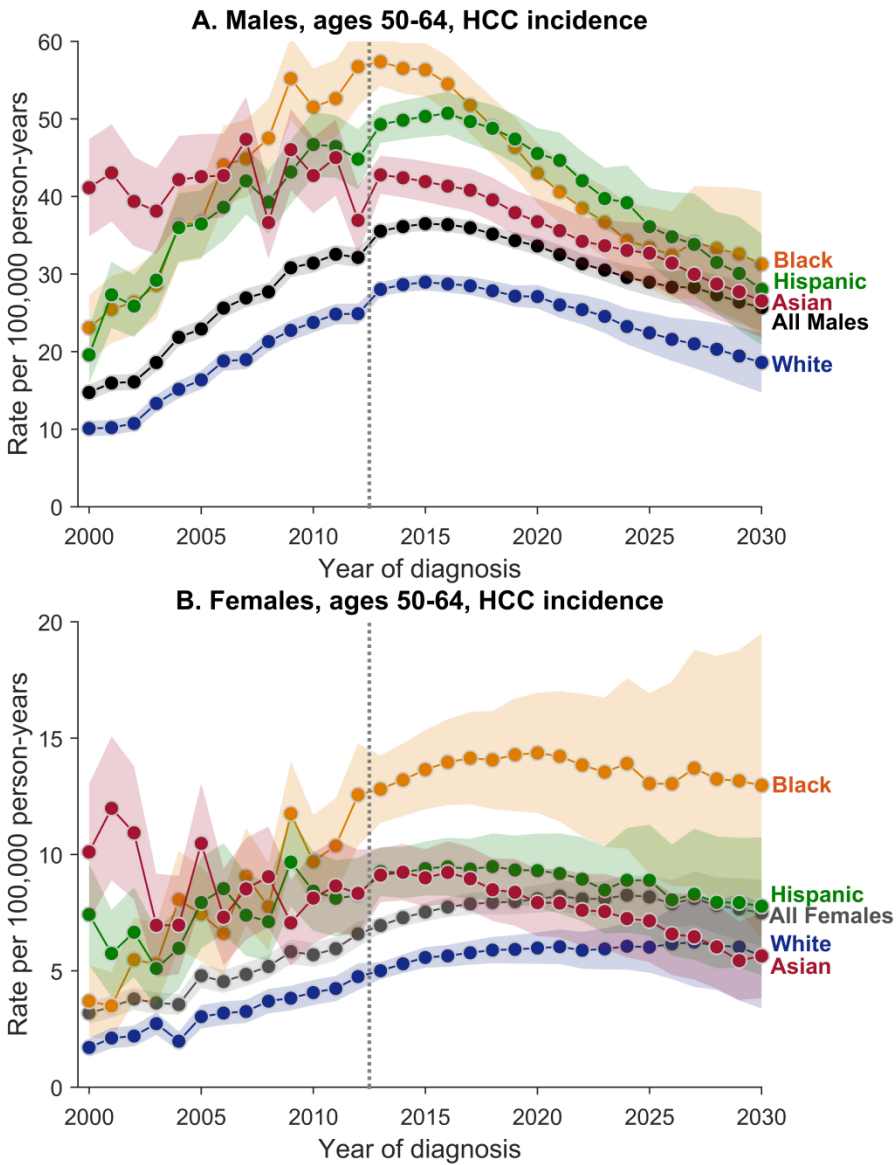



**Figure S5.** Observed and projected incidence of hepatocellular carcinoma (per 100,000 person-years) in Surveillance, Epidemiology, and End Results (SEER) 18, among 65-84 year olds overall and by race in A) males and B) females. Shaded bands show point-wise 95% confidence limits.

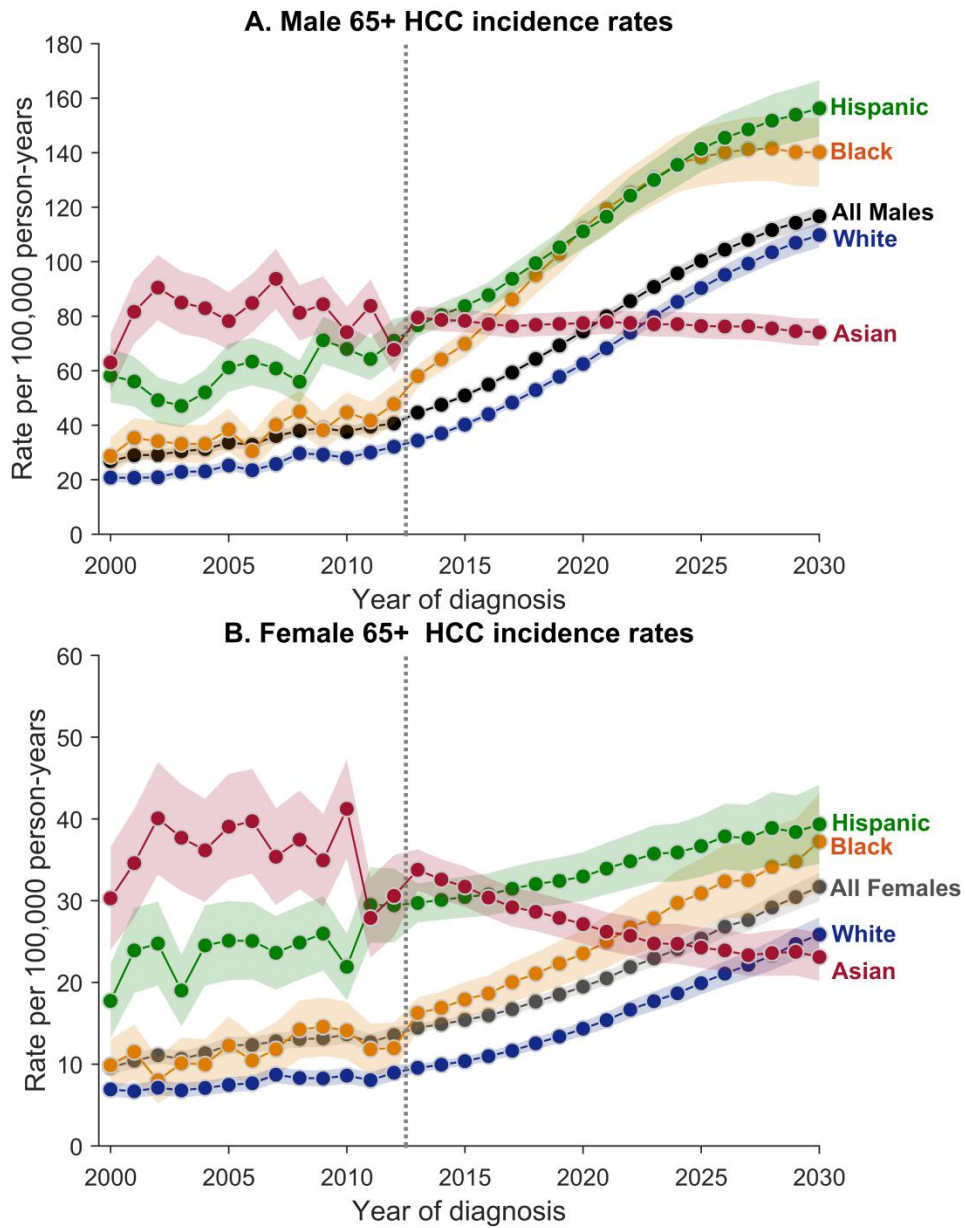

**Figure S6.** Projected burden of hepatocellular carcinoma (per 100,000 person-years) in Surveillance, Epidemiology, and End Results (SEER) 18, overall and by race in A) males and B) females. Shaded bands show point-wise 95% confidence limits\*.

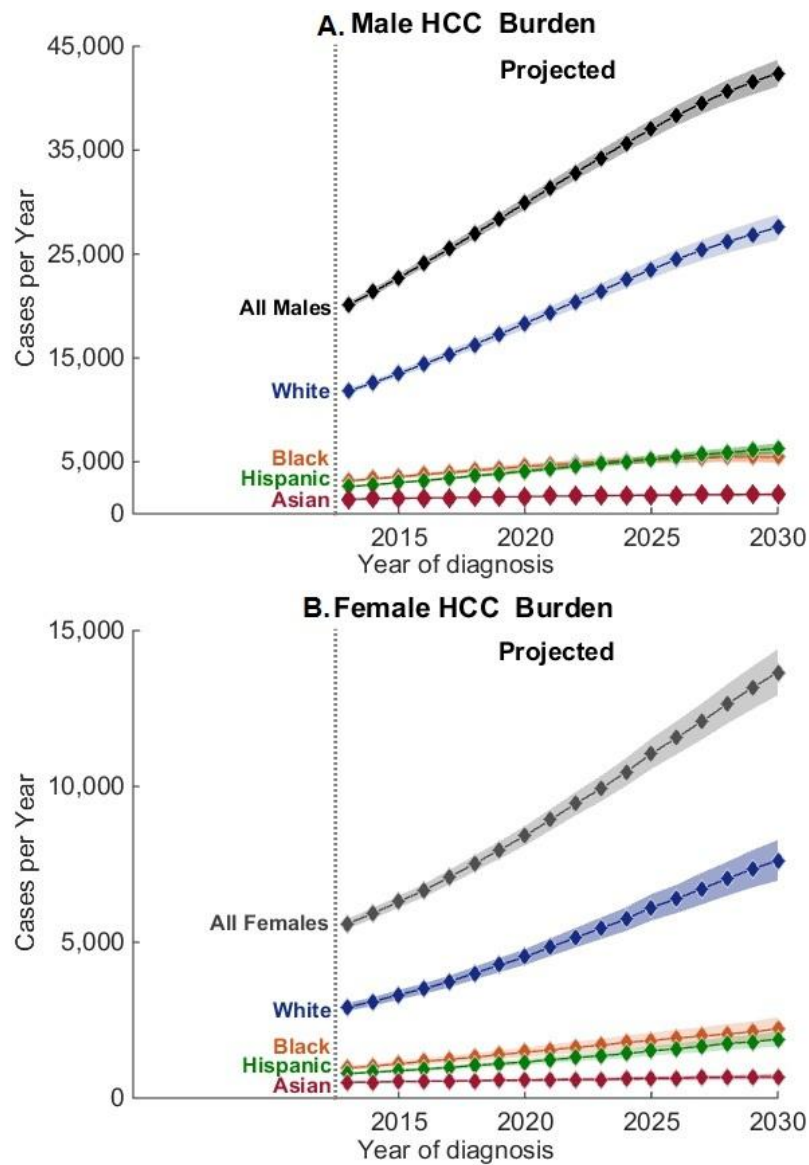

\*Population projections are provided as point estimates, without confidence intervals, for planning purposes. Thus, these confidence intervals incorporate some but not all sources of variation.

**Figure S7.** Projected burden of hepatocellular carcinoma in Surveillance, Epidemiology, and End Results (SEER) 18 by calendar period, 2000-2012 and 2013-2030 in A) males and B) females. Shaded bands show point-wise 95% confidence limits\*.

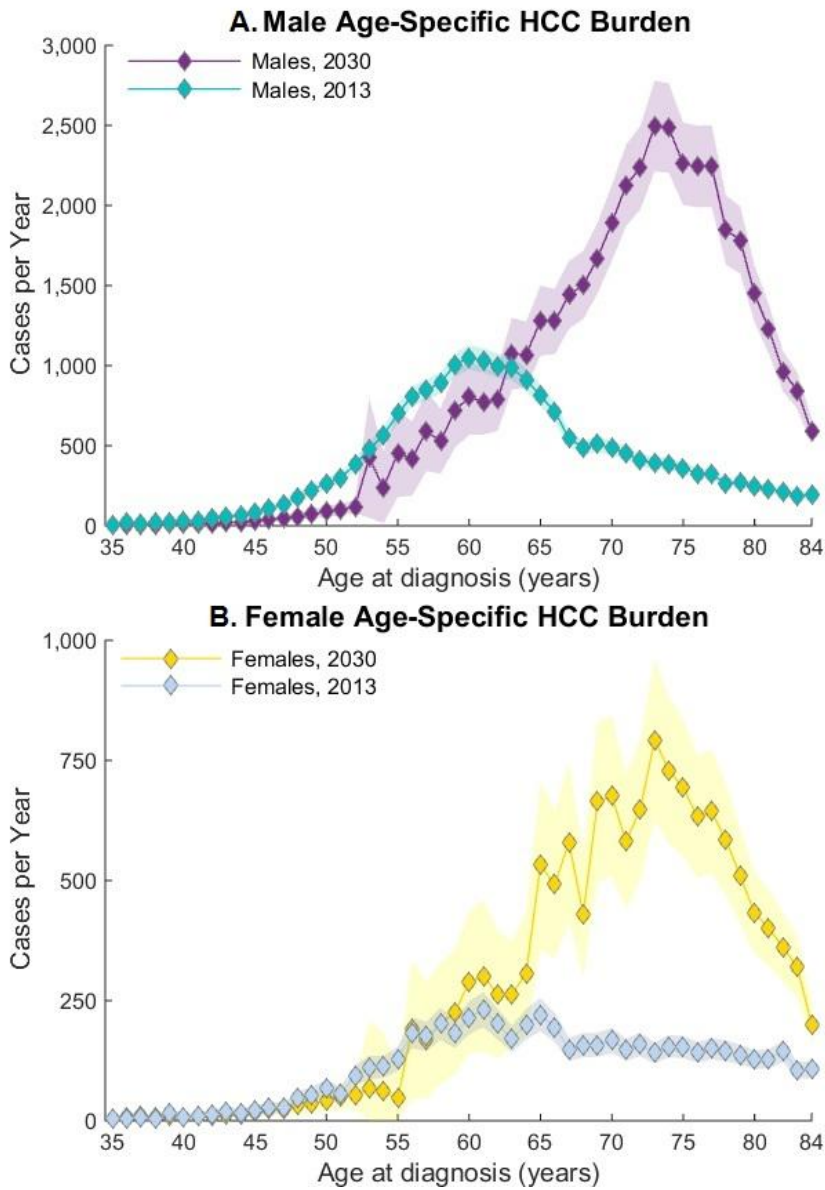

\*Population projections are provided as point estimates, without confidence intervals, for planning purposes. Thus, these confidence intervals incorporate some but not all sources of variation.

**Figure S8.** Projected burden of hepatocellular carcinoma (per 100,000 person-years) in Surveillance, Epidemiology, and End Results (SEER) 18, by age group in A) males and B) females. Shaded bands show point-wise 95% confidence limits\*.

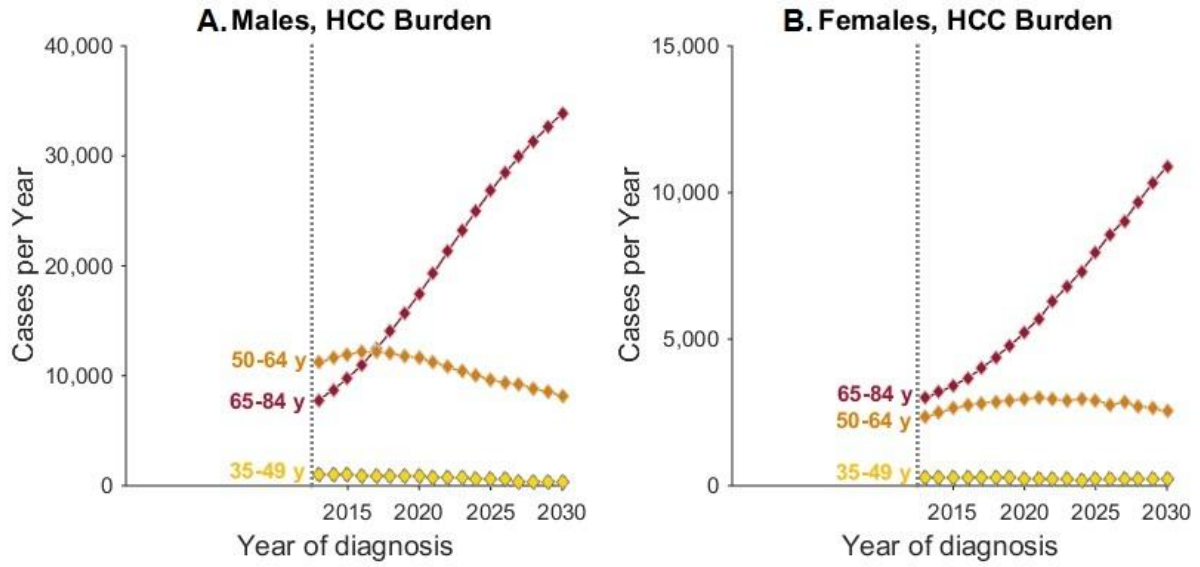

**Figure S9.** Sensitivity analysis showing potential scenarios of the impact of HCV treatment with second generation direct-acting antivirals among A) Males and B) Females. This model uses the assumptions of linear uptake in antivirals, with 50% and 80% of infections treated by 2030. Thus, each year 3.7% and 8.5% of remaining HCV infections would be treated, respectively.

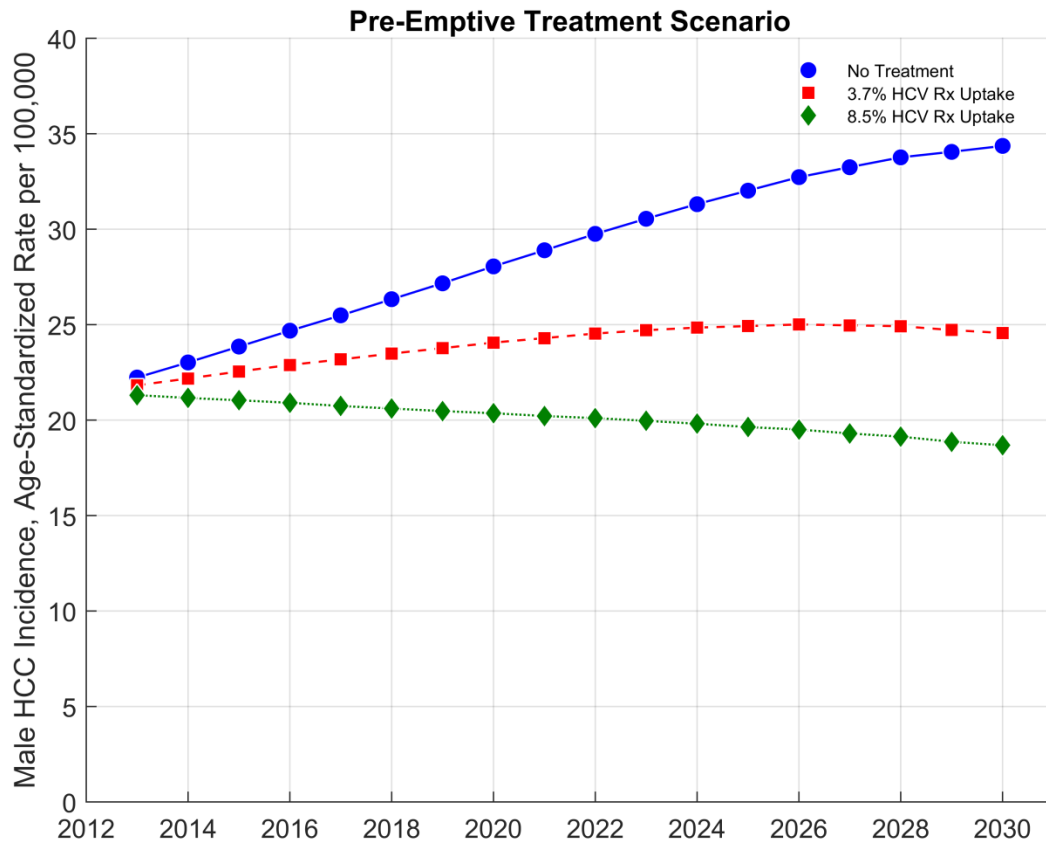

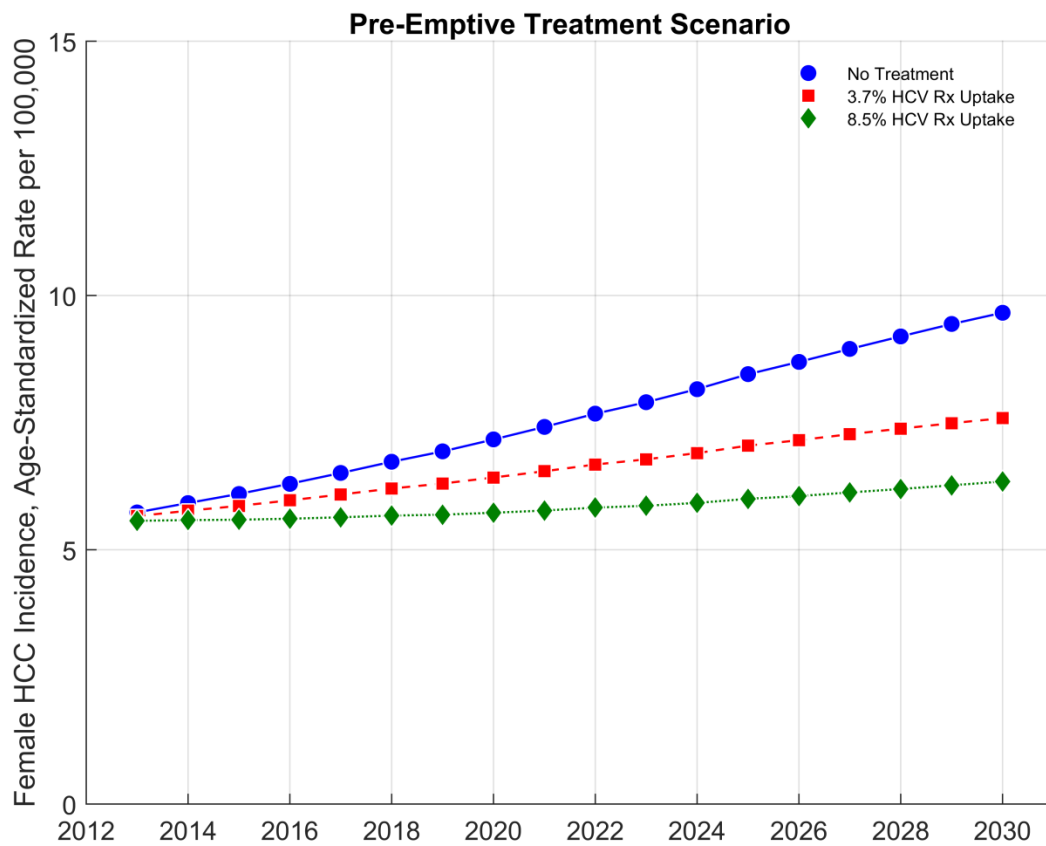

Figure S10. Goodness of fit tests for males: A) all males, B) White, C) Black, D) Hispanic, and E) Asian.

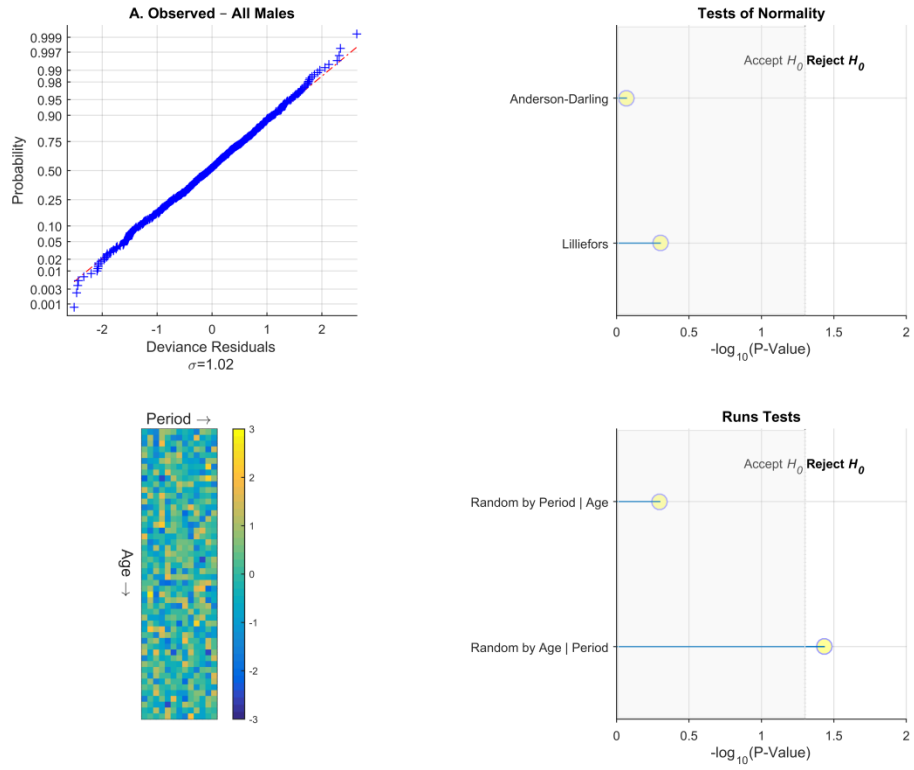

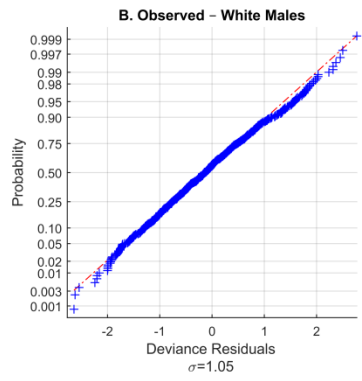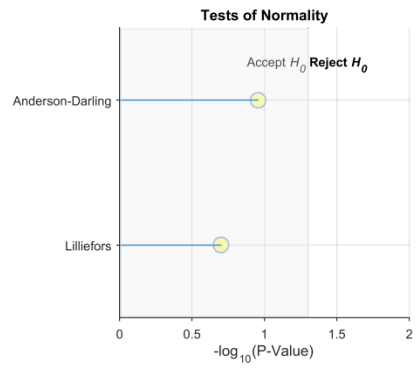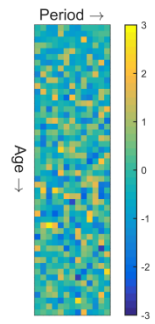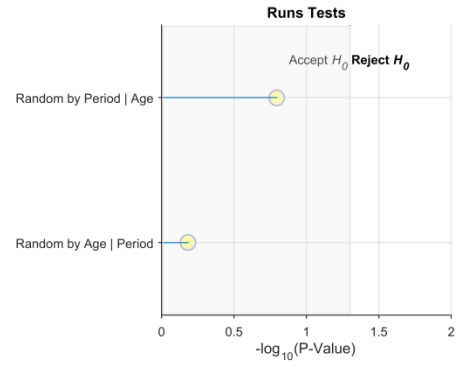



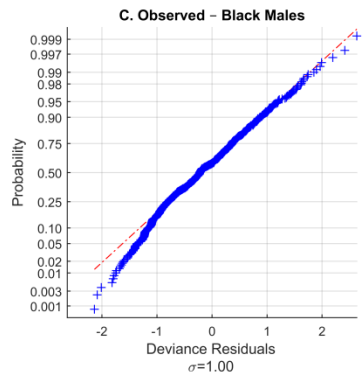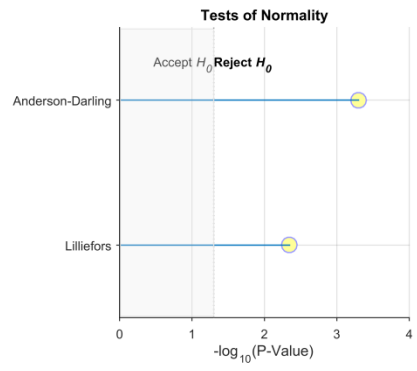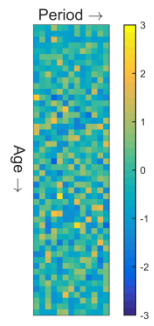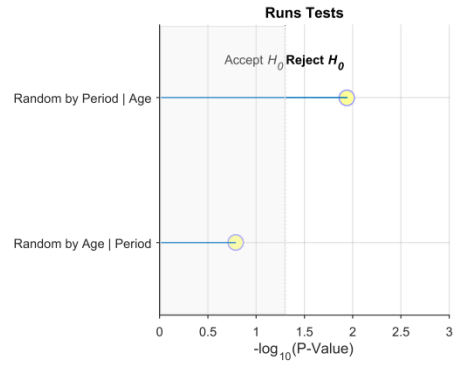

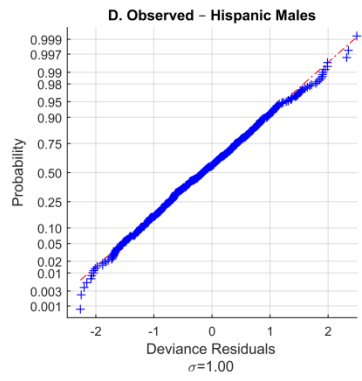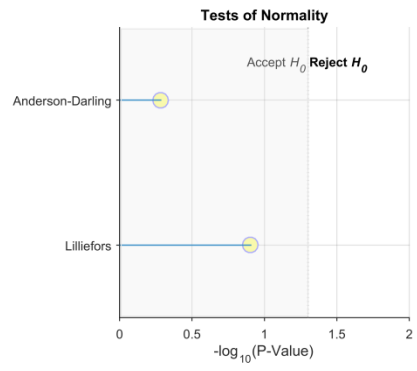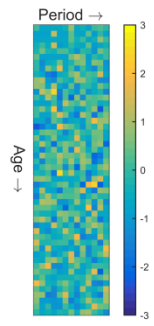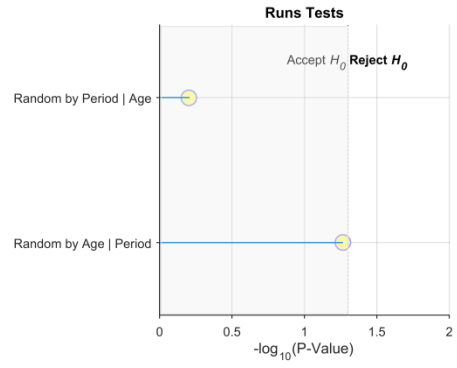

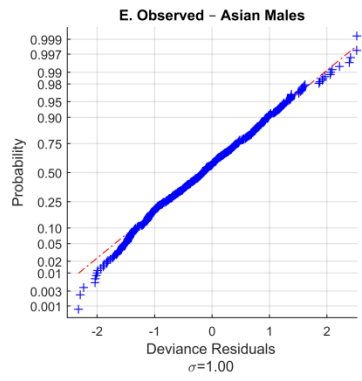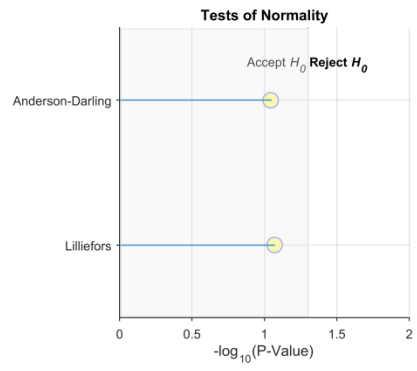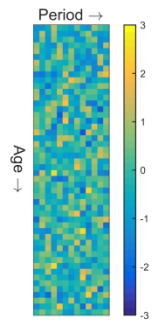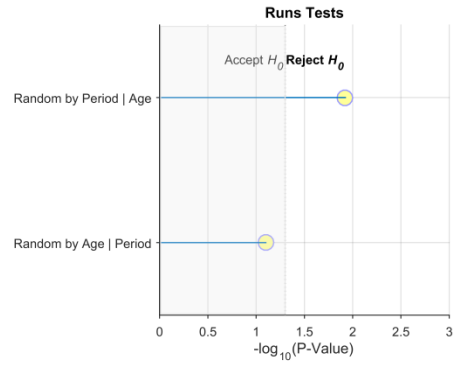

Figure S11. Goodness of fit tests for females: A) all females, B) White, C) Black, D) Hispanic, and E) Asian.

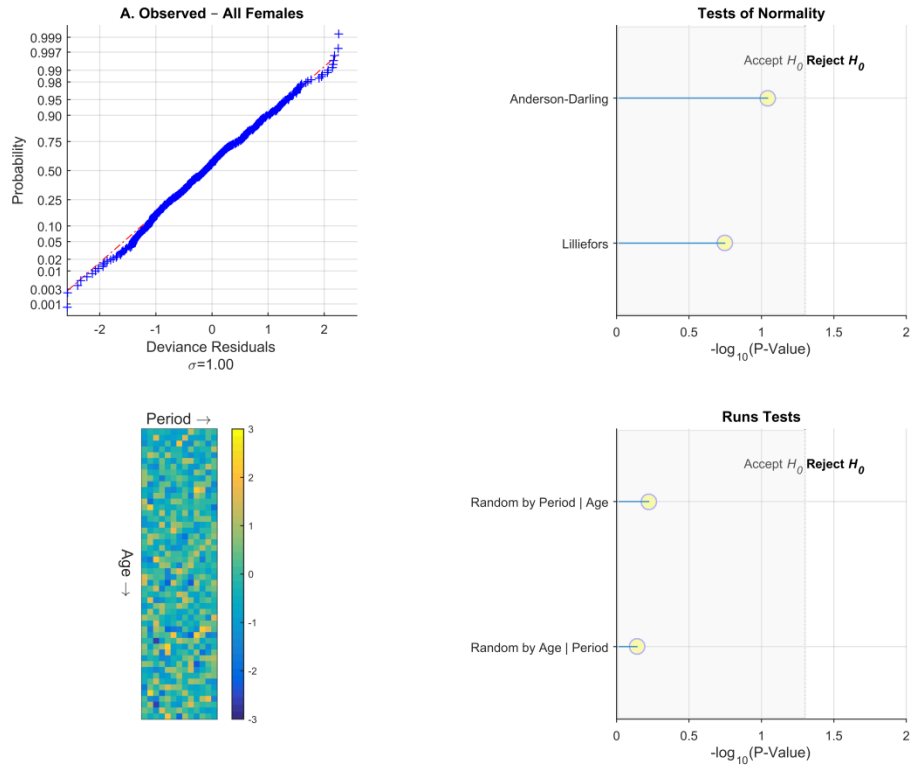

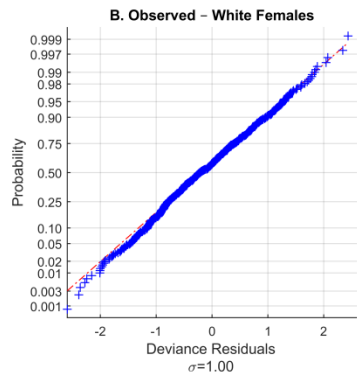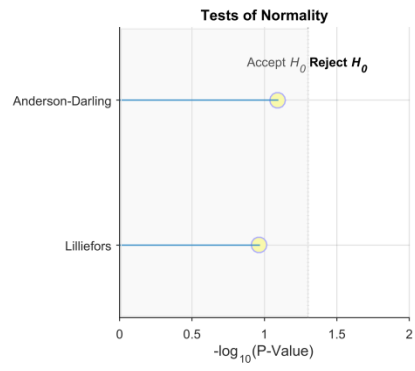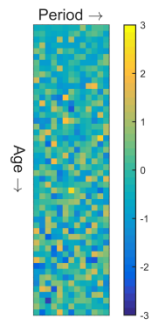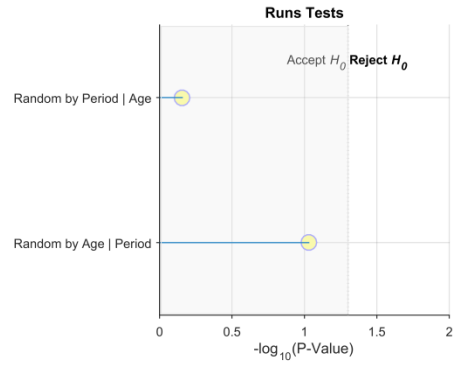

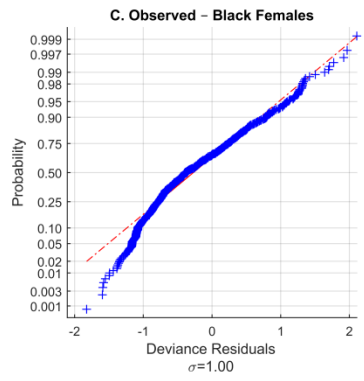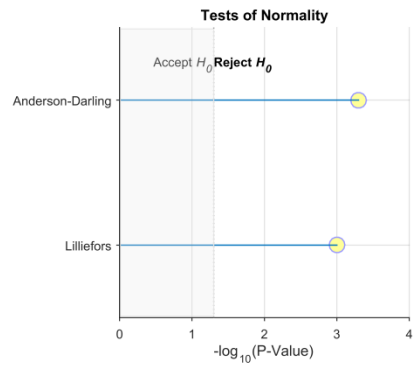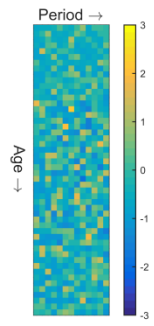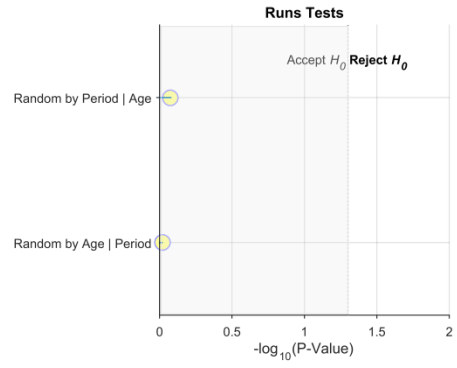

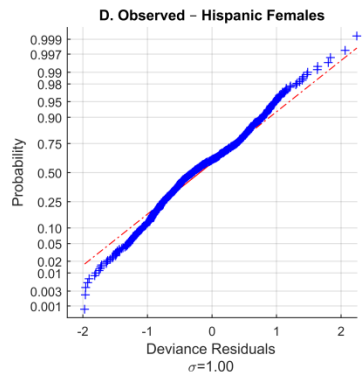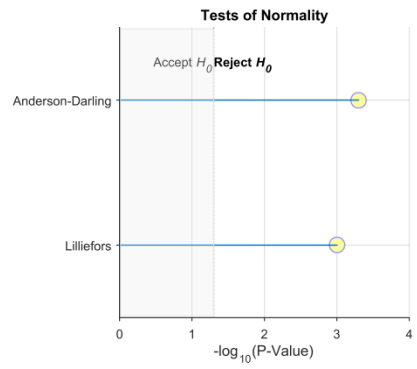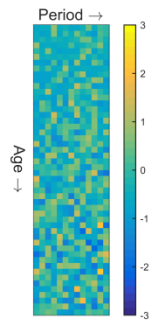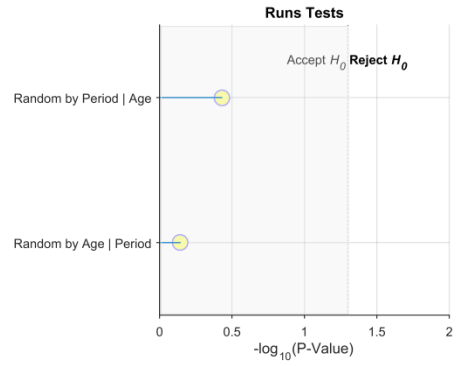

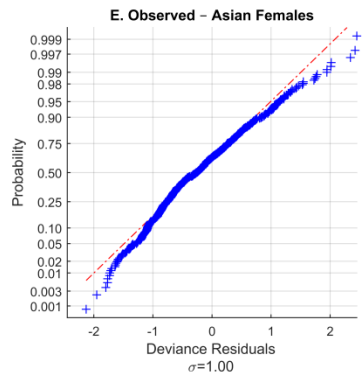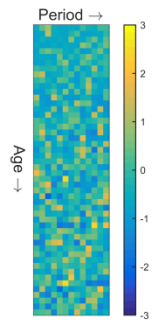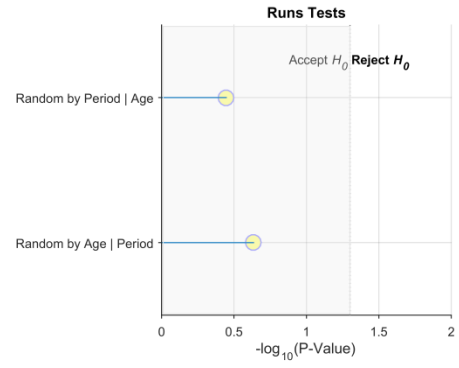

Supplement: supp_JCO.2015.64.7412_DS_2015.647412.pdf [file supp_JCO.2015.64.7412_DS_2015.647412.pdf]
